# Supplementary material for: Controlled synthesis of hollow C@TiO2@MoS2hierarchical nanospheres for high-performance lithium-ion batteries
Source: Royal Society of Chemistry journal article supplement (doi:10.1039/c8nr05451g), 2018-01-01
Supplement: c8nr05451g1.pdf [file c8nr05451g1.pdf]

## Controlled synthesis of hollow $C@TiO_2@MoS_2$ hierarchical nanospheres for high-performance lithium-ion batteries

Jie Pei,<sup>a</sup> Hongbo Geng,<sup>\*b</sup> Edison Huixiang Ang,<sup>c</sup> Lingling Zhang,<sup>a</sup> Xueqin Cao,<sup>a</sup> Junwei Zheng<sup>d</sup> and Hongwei Gu<sup>\*a</sup>

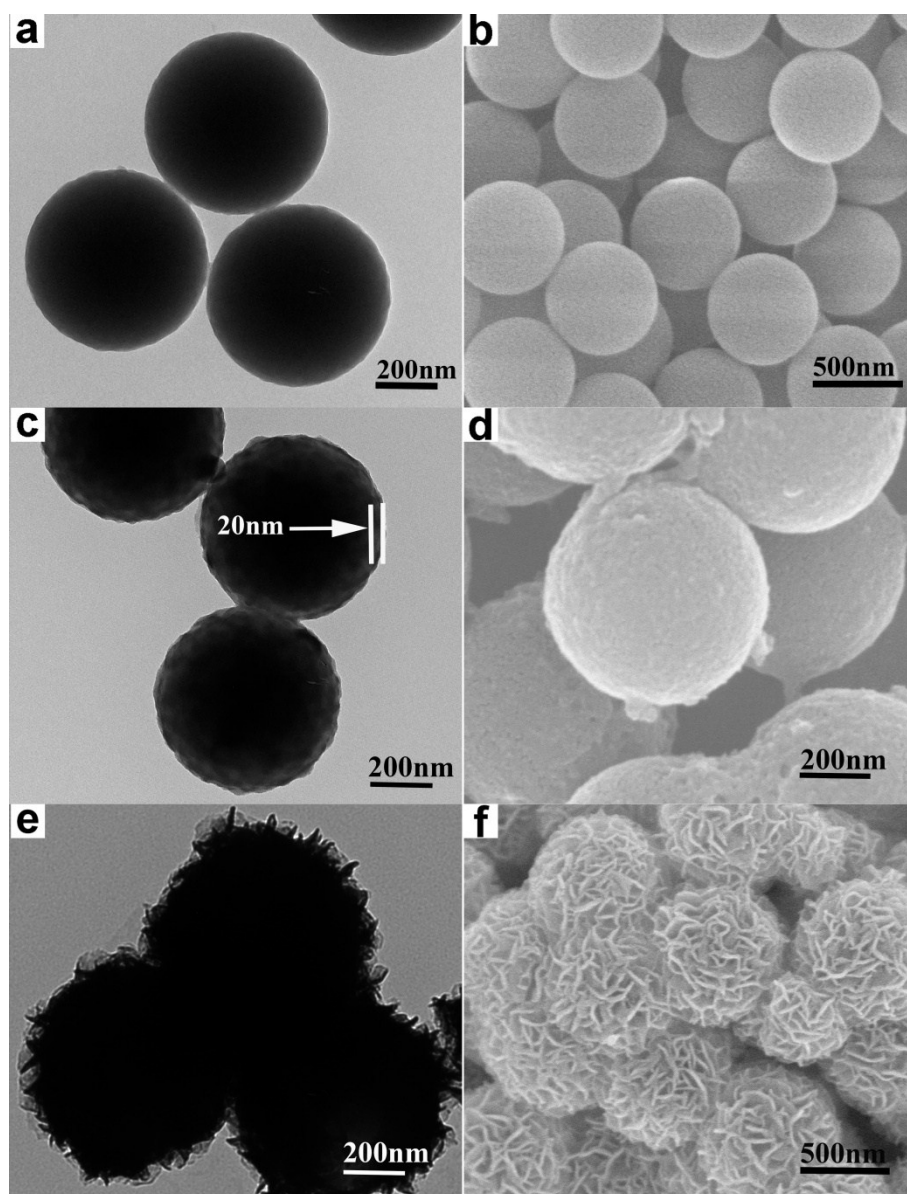

**Figure S1.** TEM and SEM images of (a-b) polystyrene spheres (PS); (c-d) PS@TiO<sub>2</sub>; (e-f)

PS@TiO<sub>2</sub>@MoS<sub>2</sub>.

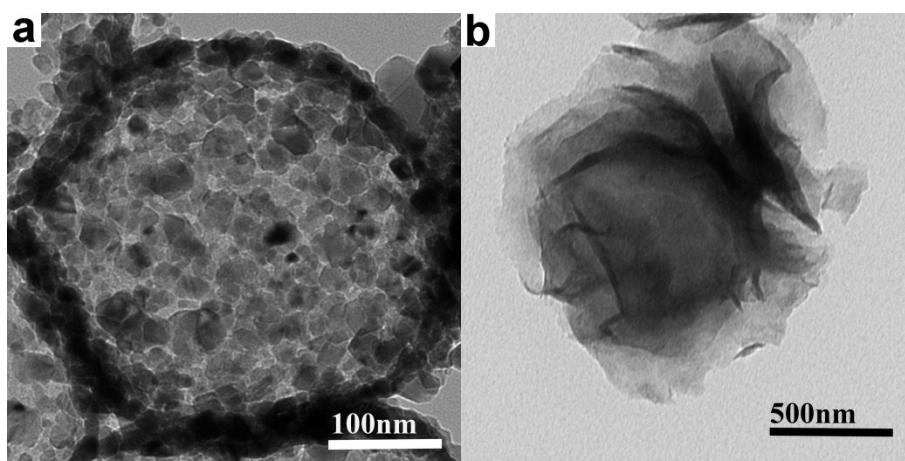

Figure S2. TEM images of (a) C@TiO<sub>2</sub>; (b) pure MoS<sub>2</sub>.

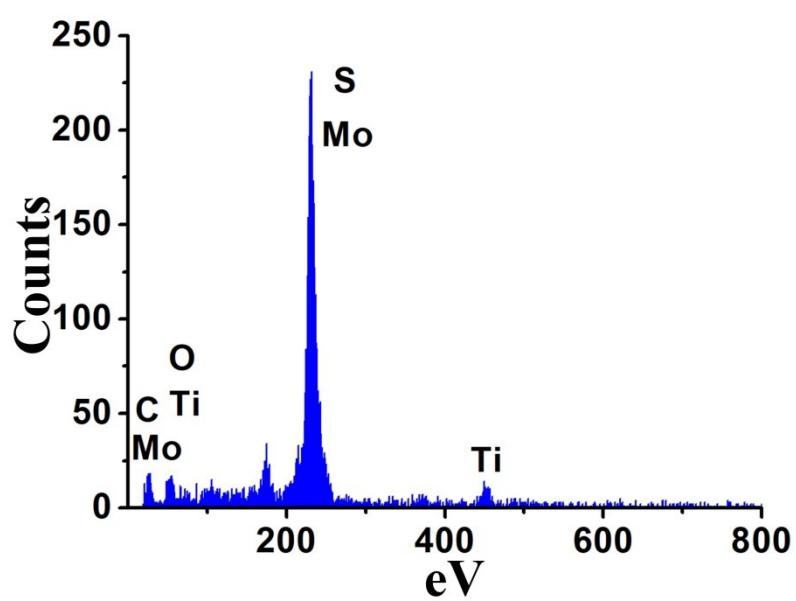

Figure S3. EDX spectrum of the C@TiO<sub>2</sub>@MoS<sub>2</sub> sample.

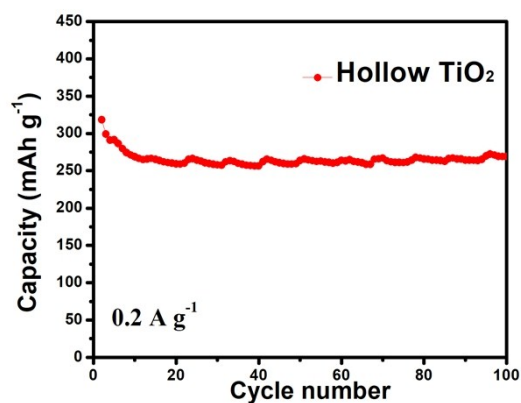

**Figure S4.** Cycling performance of the hollow TiO<sub>2</sub> electrode at a current density of 0.2 A g<sup>-1</sup>.

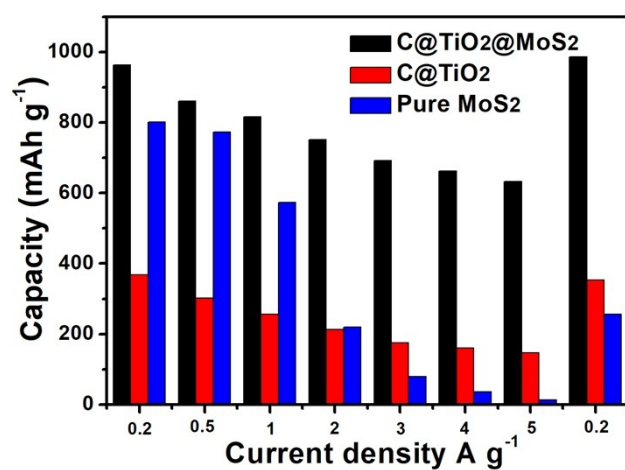

**Figure S5.** Histogram of the specific capacities of C@TiO<sub>2</sub>@MoS<sub>2</sub>, C@TiO<sub>2</sub> and pure MoS<sub>2</sub> batteries at various current densities.

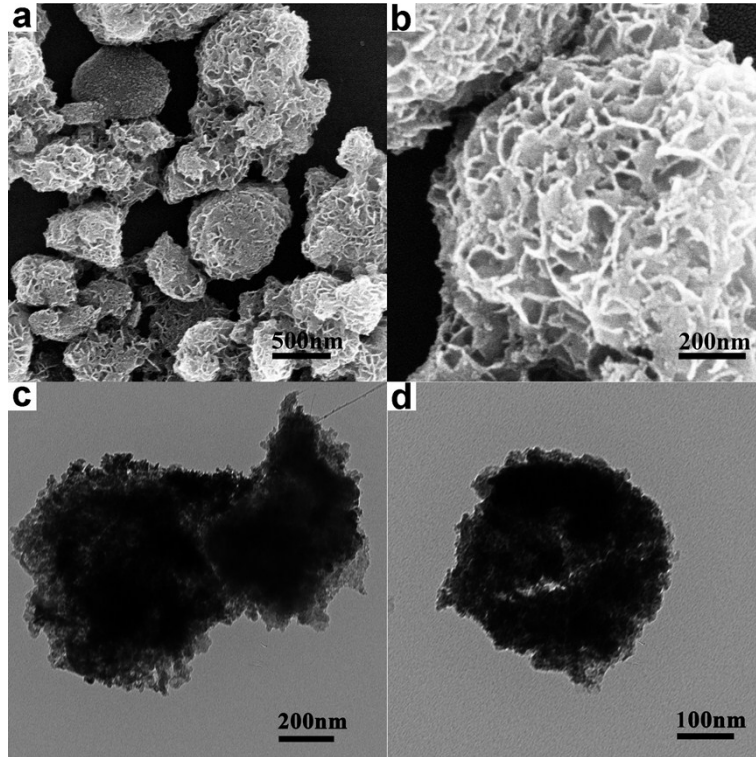

**Figure S6.** (a-b). SEM images and (c-d).TEM images of C@TiO<sub>2</sub>@MoS<sub>2</sub> composites after 600 cycles at 1 A g<sup>-1</sup>.

| Element | C K   | O K   | Mo K  | S K   | Ti K  | Total |
|---------|-------|-------|-------|-------|-------|-------|
| Wt %    | 12.85 | 17.56 | 35.47 | 18.41 | 15.71 | 100   |

**Table S1.** The contents of each component of C@TiO<sub>2</sub>@MoS<sub>2</sub>.
